# Supplementary material for: Association between haematological parameters and sickle cell genotypes in children with Plasmodium falciparum malaria resident in Kisumu County in Western Kenya
Source: BMC Infect Dis. 2020 Nov 25;20:887. doi: 10.1186/s12879-020-05625-z (PMC7690073; doi:10.1186/s12879-020-05625-z)
Supplement: Supplementary file 2 — Additional file 2. [file 12879_2020_5625_MOESM2_ESM.xlsx]

## Sheet: Rawdata-28-Jul-2020
Months	WBC	LYM%	MON%	GRAN%	RBC	MCV(FL)	HCT	MCH(Pg)	MCHC	RDW	HB	THR	MPV	PCT	PDW	Pf. Infect	Sickle Cell Genotype
1	12.43	52.5	19.5	28	4.46	70.9	31.6	23.5	33.2	10.8	10.5	348	4.5	0.16	8.3	Negative	Homozygous HbAA/HbAA
1	10.76	59	12.5	28	5.21	94.3	49.1	27.4	29.1	12.4	14.3	312	5.6	0.17	9.6	Negative	Homozygous HbAA/HbAA
1	11.15	49.7	16.3	34	4.98	96	47.8	25.1	26.1	12.6	12.5	280	6.5	0.18	10.9	Negative	Homozygous HbAA/HbAA
1	9.37	69.9	5.6	24.5	5.39	75.5	40.6	22.6	30	11.6	12.2	239	6	0.14	11.9	Positive	Heterozygous HbAA/HbSS
1	7.81	16.5	7.4	46.1	5.14	84.8	43.5	22.7	26.8	13.4	11.7	344	5.5	0.19	8.8	Negative	Heterozygous HbAA/HbSS
1	1.8	50.7	8.5	40.8	4.61	79.9	36.8	26	32.6	10.1	12	204	5.4	0.11	11.3	Negative	Heterozygous HbAA/HbSS
1	5.13	34	27.5	37.7	3.67	106	38.9	35.9	33.9	12.4	13.2	90	5.9	12.3	12.3	Positive	Homozygous HbAA/HbAA
1	10.06	40.7	11	48.3	4.59	67.4	30.9	18.5	27.5	10.6	8.5	507	5.6	0.28	9.9	Negative	Homozygous HbAA/HbAA
1	4.65	42.2	7.8	50	4.76	75.2	35.7	23.5	31.3	10.5	11.2	303	5.7	0.17	9.9	Negative	Homozygous HbAA/HbAA
1	15.6	43.3	16.9	39.8	4.65	70.5	32.7	20	28.4	11.8	9.3	363	5.1	0.19	8.9	Positive	Homozygous HbAA/HbAA
1	5.97	45.9	3.6	50.5	4.77	83.8	39.9	25.7	30.8	9.7	12.3	300	5.7	0.17	11	Negative	Homozygous HbAA/HbAA
1	7.93	64.9	9.3	25.8	5.73	70.1	40.1	16.2	23.1	14	9.3	221	5.7	0.13	9.9	Negative	Heterozygous HbAA/HbSS
1	8.23	12.1	7.1	80.8	4.51	72.9	32.8	21.9	30.1	10.4	9.9	248	5.7	0.14	9.8	Positive	Homozygous HbAA/HbAA
1	5.8	41.1	14.9	44	4.93	78.9	38.8	20	25.5	10.7	9.9	192	5.4	0.1	10.2	Positive	Homozygous HbAA/HbAA
1	8.14	64.1	19.9	25	3.32	81.2	26.9	24.3	30.1	10.4	8.1	203	5.8	0.12	10	Negative	Homozygous HbAA/HbAA
1	13.96	52.6	8.1	39.3	3.15	83.9	26.4	23.1	27.6	14.9	7.3	236	5.1	0.12	9.5	Positive	Homozygous HbSS/HbSS
1	9.5	45	12.5	41.7	4.86	67.7	32.9	21.3	31.6	13.2	10.4	197	5.5	0.11	8.2	Negative	Homozygous HbAA/HbAA
1	7.08	38.4	15.6	46	5.06	58.8	29.7	17.5	29.9	13.5	8.9	386	6.3	0.24	10.4	Positive	Homozygous HbAA/HbAA
1	9.09	50.9	16.4	32.7	5.3	56.6	29.9	16	28.4	13.1	8.5	416	6.1	0.25	9.1	Positive	Homozygous HbSS/HbSS
1	11.83	72.5	7.2	20.3	4.98	70	34.8	19	27.2	10.8	9.5	257	5.8	0.15	10.3	Positive	Homozygous HbAA/HbAA
1	15.11	65.5	5.4	29.1	5.19	61.2	31.7	18.8	30.9	12.9	9.8	227	6.3	0.14	10.4	Positive	Heterozygous HbAA/HbSS
1	9.46	59.9	6.9	33.2	4.42	69	30.4	20.5	29.9	12.1	9.1	219	6	0.13	8.7	Negative	Homozygous HbAA/HbAA
1	5.44	23.8	5.2	71	4.43	76.7	33.9	22.7	29.7	11.4	10.1	186	5.6	0.1	9.6	Positive	Homozygous HbAA/HbAA
1	7.22	54.5	10.9	34.6	5.04	56.7	28.5	17.6	31.2	15.8	8.9	304	304	0.18	9.3	Negative	Heterozygous HbAA/HbSS
1	6.01	69.2	12.9	17.9	4.82	85.1	41	21.1	24.8	10.2	10.2	409	5.3	0.22	9.2	Negative	Homozygous HbAA/HbAA
1	12.26	56.9	10.2	32.9	5.02	75.3	37.8	22.3	29.6	10.9	11.2	348	5.3	0.18	7.8	Positive	Homozygous HbAA/HbAA
1	5.95	39.6	9.3	51.1	5.14	81.9	42	22.5	27.6	9.2	7.1	192	5.7	0.11	8.1	Negative	Homozygous HbSS/HbSS
1	8.42	52.7	9	38.3	4.55	64.3	22.4	19.5	30.4	14.1	7.1	286	5.6	0.16	10.8	Negative	Homozygous HbAA/HbAA
1	11.85	30	12.2	57.8	4.37	80.6	35.2	27.4	34	9.9	12	235	4.9	0.12	8.9	Negative	Homozygous HbAA/HbAA
1	24.18	59.1	7.3	33.6	2.6	84	22	24.6	29	22.9	6.4	325	5.3	0.17	8.1	Negative	Homozygous HbAA/HbAA
1	5.62	58.4	11.2	30.4	5.1	68.4	34.8	20.1	29.5	14	10.3	224	5.3	0.12	10.2	Negative	Homozygous HbAA/HbAA
1	13.96	52.6	8.1	39.3	3.15	83.9	26.4	23.1	27.6	14.9	7.3	236	5.1	0.12	9.5	Positive	Homozygous HbSS/HbSS
1	13.96	53.9	8.1	39.3	2.94	83.1	24.9	22.1	27.7	15	6.9	229	5.1	0.13	9.2	Positive	Homozygous HbSS/HbSS
1	12.94	19.5	7	73.5	5.11	74	37.8	24	32.5	10.7	12.3	256	5.6	0.14	10.4	Negative	Homozygous HbAA/HbAA
1	8.42	52.7	9	38.3	4.55	64.3	29.2	19.5	30.4	14.1	8.9	286	5.6	0.16	10.8	Negative	Homozygous HbAA/HbAA
1	13.96	52.6	8.1	39.3	3.15	83.9	26.4	23.1	27.6	15	6.2	236	5.1	0.12	9.5	Positive	Homozygous HbSS/HbSS
1	5.29	44.6	16.2	39.2	5.41	62.5	33.8	19	30.4	10.1	10.3	269	5.6	0.15	9.1	Negative	Homozygous HbAA/HbAA
1	17.33	29.5	21.7	48.8	5.64	63.8	35.9	20	31.4	13.2	11.3	216	4.9	0.11	9.5	Positive	Heterozygous HbAA/HbSS
1	16.04	49.2	8.3	42.5	5.12	62.4	31.9	17.1	27.5	17.4	8.8	423	5.2	0.22	8	Negative	Heterozygous HbAA/HbSS
1	10.45	35.5	13.5	51	5.44	63.5	34.5	18.5	29.2	9.6	10.1	387	5.6	0.22	9.3	Negative	Homozygous HbAA/HbAA
1	4.3	31	6.7	62.3	4.84	77.4	37.4	22.9	29.6	11.5	11.1	218	6	0.13	8.5	Negative	Homozygous HbAA/HbAA
1	6.91	77.2	7.5	15.3	5.64	59.6	33.6	16.4	27.6	11.7	9.3	331	6.1	0.21	9.1	Negative	Heterozygous HbAA/HbSS
1	22.3	14.7	16	69.3	4.28	70.3	30	21.9	31.3	10.7	9.4	344	5	0.17	8.4	Negative	Homozygous HbAA/HbAA
1	13.67	54.4	15.9	29.7	4.57	75.5	34.5	24.2	32.1	11.1	11.1	78	5	0.04	7.3	Positive	Homozygous HbAA/HbAA
1	10.06	70.9	10.4	18.7	5.16	62.8	32.4	18.7	29.9	15.4	9.7	486	5.7	0.28	10.4	Positive	Heterozygous HbAA/HbSS
1	6.92	66.1	5.6	28.3	4.46	79.8	35.5	25.7	32.3	10.9	11.5	404	5.2	0.21	9.3	Positive	Homozygous HbAA/HbAA
1	9.7	8.6	7.1	84.3	4.69	77.5	36.3	24.9	32.2	10.8	11.7	245	5.5	0.13	10.9	Negative	Homozygous HbAA/HbAA
1	10.98	52	8.8	39.2	4.34	82	35.5	23.5	28.7	9.5	10.2	145	5.4	0.08	10.5	Positive	Homozygous HbAA/HbAA
1	13.6	24.3	8.9	66.8	4.89	65.7	32.1	17.1	26.1	13.5	8.4	294	5.2	0.15	9	Negative	Homozygous HbAA/HbAA
1	6.89	28.1	11.7	60.2	4.7	79.8	37.5	23.1	29	10.9	10.9	372	5.2	0.19	8.7	Negative	Homozygous HbAA/HbAA
1	11.45	36.6	7.7	55.7	4.38	61.5	26.9	20	32.7	18	8.8	269	5.8	0.16	9.2	Negative	Homozygous HbAA/HbAA
1	4.98	70.3	6.6	23.1	5.13	69.6	35.7	23.1	33.3	10.2	11.9	190	5.5	0.1	9.9	Negative	Homozygous HbAA/HbAA
1	5.06	65.8	6.4	27.8	5.24	75.2	39.4	23	30.7	10.4	12.1	167	4.5	0.08	0.05	Positive	Homozygous HbAA/HbAA
1	5.38	16.5	8.1	75.4	4.87	79.5	38.7	21.7	27.3	10.1	10.6	336	5	0.17	9	Negative	Heterozygous HbAA/HbSS
1	7.62	48.7	14.9	36.4	3.87	66	25.5	19.3	29.4	20.5	7.5	177	4.8	0.08	9.8	Positive	Homozygous HbAA/HbAA
1	8.47	10.7	12.5	76.8	4.87	73.7	35.8	22.7	31	10.5	11.1	187	4.9	0.09	8.6	Negative	Heterozygous HbAA/HbSS
1	16.37	22.3	7.9	69.8	3.48	77.5	26.9	22.1	28.6	17.8	7.7	608	5.4	0.33	10.5	Negative	Heterozygous HbAA/HbSS
1	7.41	54.7	11.8	33.8	4.94	75.5	37.2	22.6	30.1	12	11.2	300	5.4	0.16	9.1	Negative	Homozygous HbAA/HbAA
1	5.95	39.6	9.3	51.1	5.14	81.9	42	22.5	27.6	9.2	11.6	265	6.1	0.16	9.5	Negative	Homozygous HbAA/HbAA
1	7.36	43	16.5	40.5	3.86	7.29	28.1	21.2	29.1	12	8.2	103	5.1	0.05	9.5	Positive	Homozygous HbAA/HbAA
1	9.65	30.8	11.3	57.9	4.26	69.7	29.6	21.3	30.7	10.3	9.1	183	5.2	0.1	9.4	Positive	Homozygous HbAA/HbAA
1	9.8	54.3	8.9	36.6	4.82	77.8	37.4	24.2	31.2	10.7	11.7	273	4.8	0.13	8.2	Positive	Heterozygous HbAA/HbSS
1	7.77	44.2	21	34.8	3.97	74	29.3	23.1	31.3	13.6	9.2	337	5	0.17	9.1	Positive	Homozygous HbAA/HbAA
1	13.94	17.2	15.6	67.2	4.47	76.3	34.1	23.9	31.3	10.9	10.7	220	5.2	0.11	8.1	Negative	Homozygous HbAA/HbAA
1	10.36	22.9	8	69.1	4.58	75.1	34.3	25.5	34.1	11.1	11.7	356	5.2	0.19	9.5	Positive	Homozygous HbSS/HbSS
1	7.88	19.7	17.5	62.8	5.31	76.7	40.7	22.2	28.9	12	11.8	215	5	9.2	9.2	Positive	Homozygous HbAA/HbAA
1	10.06	13.3	6.6	80.1	4.59	81.3	37.3	27.6	34	8.9	12.7	235	5.5	0.13	11.7	Negative	Homozygous HbAA/HbAA
1	15.44	12.2	10.7	77.1	4.26	75.7	32.2	24.6	32.6	11.2	10.5	309	5.3	0.16	9.6	Negative	Homozygous HbAA/HbAA
1	9.14	29.7	7.6	62.7	4.05	82.2	33.2	24.1	29.5	13.5	9.8	295	5.9	0.17	10.4	Negative	Heterozygous HbAA/HbSS
1	10.97	40	7.7	52.3	5.14	84.8	43.5	22.7	26.8	13.4	11.7	344	5.5	0.19	8.8	Negative	Heterozygous HbAA/HbSS
1	9.07	46.8	7.1	46.1	5.58	75	42.1	21.8	28.9	12.3	12.2	179	6	0.11	10.9	Positive	Homozygous HbAA/HbAA
1	7.6	18.3	17.5	64.2	5.43	73	39.6	20.9	28.7	10.7	11.1	130	5.1	0.18	8.8	Positive	Homozygous HbAA/HbSS
1	7.2	75.8	5.5	18.7	4.25	76.5	32.5	26.5	34.7	8.5	11.3	363	4.7	0.17	9.1	Positive	Homozygous HbAA/HbAA
1	8.51	43.7	5.1	51.2	5.26	66.5	34.9	19.7	29.9	13.9	10.4	234	5.7	0.13	10.6	Positive	Homozygous HbAA/HbAA
1	5.42	59.2	8.3	32.5	3.82	76.2	29.1	24.8	32.6	10.4	9.5	248	5.5	0.14	10.8	Negative	Homozygous HbAA/HbAA
2	18.81	10	17.6	72.4	4.78	82.9	39.6	22.8	27.5	11.5	10.9	293	5.6	0.16	9.9	Negative	Heterozygous HbAA/HbSS
2	10.12	17	3.1	79.9	5.23	81.6	42.6	23.3	28.6	10.4	12.2	339	5.3	0.18	9.3	Negative	Heterozygous HbAA/HbSS
2	13.96	52.6	8.1	39.3	3.01	83.9	26.4	23.1	27.6	14.9	7.1	236	5.1	0.12	9.5	Negative	Heterozygous HbAA/HbSS
2	10.27	9.7	6.7	83.6	4.59	82.2	37.7	54	31.8	10.4	12	254	4.8	0.12	9.7	Negative	Homozygous HbAA/HbAA
2	7.26	33.7	6.3	60	4.69	77.9	36.5	23.4	30.1	10.7	11	258	5.5	0.14	11.2	Negative	Homozygous HbAA/HbAA
2	12.3	23.6	7.7	68.7	4.71	78	36.7	21.6	27.7	12	10.2	290	5	0.14	9.1	Negative	Homozygous HbAA/HbAA
2	5.38	16.5	8.1	75.4	4.87	79.5	26.1	21.7	27.3	10.1	8.4	336	5	0.17	9	Positive	Heterozygous HbSS/HbSS
2	8.84	17.5	16.6	65.9	4.66	76.8	35.7	24.2	31.6	12	11.3	925	5.2	0.15	7.9	Negative	Homozygous HbSS/HbSS
2	7.42	57.9	7.9	34.2	4.97	82.7	41.1	23.9	28.9	10.4	11.9	341	5.8	0.2	9.3	Negative	Homozygous HbAA/HbAA
2	5.47	29	15.2	55.8	5.34	83.3	44.4	23	27.7	10.4	12.3	305	5.4	0.16	8.1	Positive	Homozygous HbAA/HbAA
2	4	51.5	4.8	43.7	4.49	85.3	38.2	27.1	31.9	9.7	12.2	283	5.1	0.14	9.6	Positive	Homozygous HbAA/HbAA
2	19.22	23.3	11.3	65.4	2.9	86.1	24.9	24.1	28.1	25.8	7	498	5.3	0.26	9.8	Positive	Homozygous HbAA/HbAA
2	5.95	39.6	9.3	51.1	5.14	81.9	42	22.5	27.6	9.2	11.6	265	6.1	0.16	9.5	Negative	Homozygous HbSS/HbSS
2	20.83	8.9	7.8	83.3	2.37	9.6	22.9	31.2	32.3	25.3	7.4	263	5.7	0.15	9.6	Positive	Homozygous HbAA/HbAA
3	16.02	10.1	6.3	83.6	4.44	76.6	34	20.7	27	12.6	9.2	222	5.4	0.12	7.8	Negative	Homozygous HbAA/HbAA
3	10.51	11.1	12.8	76.1	6.01	66.2	39.7	19.4	29.4	10.2	11.7	300	5.1	0.15	9.1	Positive	Homozygous HbAA/HbAA
3	7.42	53.3	8.3	38.4	4.88	83.4	40.6	54	30.7	9.6	12.5	393	5.1	0.2	10.2	Negative	Homozygous HbAA/HbAA
3	4.88	21.9	17.5	60.6	4.21	78.8	33.1	23.7	30.2	11.6	10	67	6	0.04	7	Positive	Heterozygous HbAA/HbSS
3	16.4	14.2	12.4	73.4	4.97	77.4	38.4	22.5	29.1	10.9	11.2	216	5.6	0.12	9.6	Positive	Homozygous HbAA/HbAA
3	5.8	49.5	6.2	44.3	5.39	90.4	48.7	24.4	27.1	10.2	13.2	274	5.1	0.14	9.3	Negative	Homozygous HbAA/HbAA
3	14.81	30.7	10.5	58.8	3.31	81.6	27	23	29.2	15.3	7.9	691	5.4	0.37	9.1	Negative	Heterozygous HbAA/HbSS
3	6.99	23.5	33.2	43.3	2.6	74.2	19.2	20.3	27.6	11.9	5.3	103	5.8	0.06	8.4	Positive	Homozygous HbAA/HbAA
3	8.87	12.6	10.2	77.2	4.8	62.5	30	16.6	26.6	15	8	297	6.4	0.19	12.4	Positive	Homozygous HbAA/HbAA
3	10.36	22.9	8	69.1	4.58	76.2	34.3	23.5	33.1	11.1	7.7	420	5.2	0.19	9.5	Positive	Homozygous HbSS/HbSS
1	9.37	57.7	12.5	29.8	3.8	98.3	37.3	25.7	26.2	12.7	9.8	296	5.9	0.17	10	Negative	Homozygous HbAA/HbAA
1	13.06	35.9	15.1	49	3.54	84.3	29.8	27.9	33.2	12.3	9.9	262	5.4	0.14	9.2	Negative	Homozygous HbAA/HbAA
1	12.14	61.4	8.8	29.8	3.86	80.3	30.9	23.8	29.7	15.1	9.2	349	6.6	0.23	12.2	Negative	Homozygous HbSS/HbSS
1	5.86	57	12.7	29.4	3.98	96	38.4	29.1	30.2	12.9	11.6	225	6.4	0.14	11.6	Negative	Heterozygous HbAA/HbSS
1	8.78	62.5	7.2	30.3	3.92	74.8	29.3	26.5	35.4	12.3	10.4	206	5.6	0.12	10.3	Negative	Homozygous HbAA/HbAA
1	5.69	39.4	16.9	43.7	4.78	66.9	31.9	20.7	31	11	9.9	262	5.3	0.14	7.8	Negative	Homozygous HbAA/HbAA
1	9.4	57	9.3	33.7	4.87	73.9	35.9	24.6	33.4	13.7	12	225	5.1	0.11	8.7	Negative	Homozygous HbAA/HbAA
1	5.69	37.2	15.6	47.2	4.84	75.5	36.5	23.7	31.5	10.9	11.5	236	5.7	0.13	8	Negative	Homozygous HbAA/HbAA
1	12.23	36.1	8.1	55.8	4.83	75.8	36.6	22.7	30	11.9	11	318	5.5	0.17	9.6	Negative	Homozygous HbSS/HbSS
1	17.18	5.7	15.8	78.5	5.57	65.1	36.2	21	32.3	9.3	11.7	280	5.3	0.15	9.5	Negative	Heterozygous HbAA/HbSS
1	6.95	80.4	7	12.6	6.12	57.5	35.1	15.3	26.7	12.3	9.4	273	6	0.16	10.9	Negative	Homozygous HbAA/HbAA
1	9.57	63.4	21.8	14.8	2.97	73.2	21.7	24.2	33.1	12.5	7.2	111	5.7	0.06	9	Positive	Homozygous HbSS/HbSS
1	10.04	28	18	54	4.73	69.1	32.6	22.6	32.8	9.6	10.7	507	4.7	0.24	8.4	Positive	Heterozygous HbAA/HbSS
1	8.54	39.4	10.9	49.7	5.55	57.2	31.7	14	24.6	13.4	7.8	510	5.9	0.3	10.8	Positive	Homozygous HbAA/HbAA
1	12.77	53.5	12	34.5	5.57	60.7	33	15.6	25.7	15.3	8.7	329	5.8	0.19	10.3	Negative	Homozygous HbAA/HbAA
1	5.62	43	13	44	4.47	64	28.6	20.8	32.5	11.1	9.3	201	5.5	0.11	10.1	Negative	Homozygous HbAA/HbAA
1	22.9	22.5	7.3	70.2	4.71	71.6	33.7	19.1	26.7	12.1	9	381	5.4	0.21	9.6	Negative	Homozygous HbSS/HbSS
1	5.47	40.7	22	37.3	4.4	62.9	27.6	19	30.4	12.4	8.4	243	5.6	0.14	9.6	Positive	Homozygous HbAA/HbAA
1	8	82.1	7	10.9	4.27	61.7	26.3	18.2	29.6	15.3	7.8	277	5.4	0.15	10.2	Negative	Heterozygous HbAA/HbSS
1	5.72	77.8	7.4	15.5	5.62	61.2	34.3	15.4	25.3	15.2	8.7	329	5.9	0.19	10.4	Negative	Homozygous HbAA/HbAA
1	11.4	52	11.4	39.4	3.05	77.9	34.2	20.1	29.6	12.1	10.5	202	4.9	0.1	8.6	Negative	Homozygous HbSS/HbSS
1	8.82	60.5	12.7	26.8	5.07	46.7	23.6	14.9	32.2	17.6	7.6	374	6.2	0.23	10.4	Negative	Heterozygous HbAA/HbSS
1	7.77	33.4	16.1	50.5	4.51	56.4	25.4	16.6	29.5	16.8	7.5	359	5.6	0.2	9.7	Negative	Homozygous HbAA/HbAA
1	8	46.5	10.9	42.6	5.15	70.3	36.2	20.9	29.8	11.3	10.8	197	5.3	0.1	9.3	Negative	Homozygous HbAA/HbAA
1	18.44	24.5	13	62.5	5.61	54.1	30.3	14.4	26.7	17.4	8.1	689	5.2	0.36	7.8	Negative	Homozygous HbAA/HbAA
1	17.99	41.1	8.4	50.5	5.53	71.5	39.5	19.5	27.3	12	10.8	237	5.9	0.14	11.4	Negative	Heterozygous HbAA/HbSS
1	10.36	30	23.6	46.4	4.64	73.5	34.1	20.4	27.8	11.2	9.5	507	5.3	0.27	8.5	Negative	Homozygous HbAA/HbAA
1	6.14	52.7	7.7	39.6	5.3	52.9	28	13.5	25.7	19.2	7.2	303	5.9	0.18	10.9	Negative	Homozygous HbAA/HbAA
1	13.96	52.6	8.1	39.3	3.15	83.9	26.4	23.1	27.6	14.9	7.3	236	5.1	0.12	9.5	Positive	Homozygous HbSS/HbSS
1	12.68	24.2	11.9	63.9	4.99	60	29.9	16.4	27.4	15.5	8.2	352	6	0.12	10.6	Positive	Homozygous HbSS/HbSS
1	8.26	55.3	7.6	37.1	4.38	76.1	33.3	26	34.2	10.7	11.4	259	5.8	0.15	11.2	Negative	Heterozygous HbAA/HbSS
1	14.82	52.6	10.7	36.7	5.41	73.4	39.7	17.5	23.9	11.9	9.5	400	5.6	0.22	8.9	Negative	Homozygous HbAA/HbAA
1	8.51	63.4	8.9	27.7	5.13	73.4	37.6	21.8	29.7	12.1	11.2	258	6	0.15	10	Negative	Homozygous HbAA/HbAA
1	9.35	47.4	12.2	40.4	5.43	64.9	35.2	17.4	26.9	15.9	9.5	143	6.3	0.09	12	Positive	Homozygous HbAA/HbAA
1	10.91	54.2	15.2	30.6	4.67	68.5	31	21.8	31.9	10.3	10.2	239	5.5	0.13	8.6	Positive	Homozygous HbAA/HbAA
1	6.9	66.2	7.2	26.6	4.23	55.2	23.3	16.3	29.6	15.9	6.9	303	4.7	0.14	7.4	Positive	Homozygous HbAA/HbAA
1	15.89	30.6	12.9	56.5	4.8	72.1	34.6	21.2	29.4	13.5	10.2	203	5.7	0.12	8.9	Positive	Homozygous HbAA/HbAA
1	4.87	64	16.2	19.8	5.29	69.3	36.6	19.8	28.6	10.6	10.5	258	5.3	0.14	8.6	Positive	Homozygous HbAA/HbAA
1	19.17	54.4	12.7	32.9	2.91	88.5	25.7	26.4	29.9	21.3	7.7	238	5.4	0.13	8.6	Positive	Heterozygous HbAA/HbSS
1	9.59	70.7	8.9	20.4	4.83	76.3	36.8	22.9	30.1	12.1	11.1	371	5.3	0.2	9.2	Negative	Heterozygous HbAA/HbSS
1	18.1	39.9	13.5	46.6	3.72	74	27.5	22	29.8	11.4	8.2	262	4.8	0.13	8.6	Positive	Homozygous HbAA/HbAA
1	11.4	52	11.4	39.4	3.05	77.9	34.2	20.1	29.6	12.1	11.9	207	5.9	0.1	9.6	Negative	Homozygous HbAA/HbAA
1	8.62	68.5	12.1	19.4	4.99	49.7	24.8	14.4	29	18	7.2	596	6.1	0.36	9.6	Negative	Homozygous HbAA/HbAA
1	8	26.6	12.7	60.7	5.1	63.1	32.1	16.6	26.4	15.1	8.5	318	6.1	0.19	10.5	Negative	Homozygous HbAA/HbAA
1	8.58	48.8	11.6	39.6	4.07	71.5	29.1	23.5	32.9	11.8	9.6	299	5	0.15	9.4	Negative	Homozygous HbAA/HbAA
1	4.8	68	8.4	23.6	4.27	72.7	31	25	34.5	12.1	10.1	238	5.6	0.13	9	Negative	Homozygous HbAA/HbAA
1	20.54	38.5	7.6	53.9	3.36	65.5	22	19	29	13.5	6.4	630	5.5	0.35	8.9	Positive	Homozygous HbAA/HbAA
1	7.37	29.6	8.9	61.5	3.8	75.4	28.6	24.2	32.1	12.9	9.2	154	4.8	0.07	8.9	Positive	Homozygous HbAA/HbAA
1	11.71	31.4	10.5	58.1	4.91	70.8	34.7	19.5	27.6	14.9	9.6	176	5.7	0.1	10.3	Negative	Homozygous HbAA/HbAA
1	11.91	36.1	6.6	57.3	3.86	80.2	30.9	26.4	33	10.7	10.2	498	5.8	0.29	10.1	Positive	Homozygous HbAA/HbAA
1	5.47	40.7	22	37.3	4.4	62.9	27.6	19	30.4	12.4	8.4	389	5.6	0.14	9.6	Positive	Homozygous HbSS/HbSS
1	12.71	31.1	10.5	58.4	4.99	75.8	37.7	21.5	27.6	14.9	9.6	176	5.7	0.1	10.3	Positive	Homozygous HbAA/HbAA
1	5.66	58.6	8.9	32.9	4.58	72	32.9	21.3	29.7	12	9.8	265	5.2	0.14	8.8	Negative	Homozygous HbAA/HbAA
1	9.78	46.1	10	45.5	4.69	76.3	35.7	24.3	31.9	10.8	11.4	378	5.7	0.22	8.5	Negative	Homozygous HbAA/HbAA
1	6.83	52	9	39	4.3	79	33.9	23.4	29.7	11.9	10.1	437	5.1	0.22	8.1	Negative	Homozygous HbAA/HbAA
1	7.97	18.4	22.5	59.1	4.62	71.9	33.2	22.7	31.6	11.8	10.5	224	5.9	0.13	10.4	Positive	Homozygous HbAA/HbAA
1	7.04	68.1	8.2	23.7	5.81	72.8	42.2	20.1	27.7	9.9	11.7	285	5.2	0.15	8.4	Negative	Heterozygous HbAA/HbSS
1	13.31	59.7	9.3	31	4.91	63	30.9	19.5	31	15.8	9.6	263	5.1	0.13	9	Negative	Homozygous HbSS/HbSS
1	12.02	15	11.1	73.9	5.21	71.6	37.3	23	32.1	10.8	12	348	5	0.17	7.6	Negative	Homozygous HbAA/HbAA
1	8.5	12.2	10.9	76.9	4.63	75.6	35	24.1	32	9.7	11.2	249	5.3	0.13	9.3	Negative	Homozygous HbAA/HbAA
1	9.8	57	9.3	33.7	4.87	73.9	35	24.6	33.4	13.7	12	225	5.1	0.11	8.7	Negative	Homozygous HbAA/HbAA
1	12.07	77.6	10.4	12	4.43	69.1	30.6	21.2	30.7	11.1	9.4	416	5.5	13	9.3	Negative	Homozygous HbAA/HbAA
1	14.45	19	11.9	69.1	4.62	71.4	32.9	20.5	28.8	13	9.5	244	5.5	0.13	9	Negative	Homozygous HbAA/HbAA
1	5.88	34.8	9.2	56	3.99	81.9	32.6	25.3	30.9	9.2	10.1	223	5.2	0.12	8.8	Negative	Homozygous HbAA/HbAA
1	5.42	47.1	6.9	45.6	4.24	77.6	32	25.1	32.6	11.8	10.3	190	4.6	0.09	9.2	Negative	Homozygous HbAA/HbAA
1	16.08	45.2	7	47.8	5.46	67.2	36.6	22.8	34.1	11	12.5	349	4.8	0.17	8.9	Negative	Homozygous HbAA/HbAA
1	8.88	13.1	6.9	80	6	79.7	47.8	20	25.1	10.4	12	235	5.6	0.13	11.2	Negative	Homozygous HbAA/HbAA
1	6.33	21.6	12.6	61.3	6.04	78.3	47.2	19.2	24.5	11.2	11.6	306	5.1	0.16	8.9	Negative	Heterozygous HbAA/HbSS
1	8.03	61.2	7.8	31	4.73	79.2	37.4	22.8	28.8	11.1	10.8	297	5.6	0.17	9.2	Positive	Homozygous HbAA/HbAA
1	11.87	40.1	11.3	48.6	3.73	75.2	28	23	31	11.4	6.5	295	5.4	0.16	9.5	Positive	Homozygous HbAA/HbSS
1	5.85	47.1	7.3	45.6	4.07	77.6	31.5	25.3	32.6	11.7	10.3	190	4.6	0.09	9.2	Negative	Homozygous HbAA/HbAA
1	6.9	38	11.2	50	3.93	81.9	32	25.9	31.7	9.6	10.2	183	5.2	0.1	10.8	Positive	Heterozygous HbAA/HbSS
1	7.1	36	10.1	49	3.93	81.9	32	25.9	31.7	9.6	10.1	179	5.2	0.1	10.8	Positive	Heterozygous HbAA/HbSS
1	16.16	20.8	11.2	68	4.72	75.3	35.5	23.9	31.8	11.2	11.3	312	4.3	0.13	8.9	Positive	Homozygous HbAA/HbAA
1	5.66	58.6	8.9	32.9	5.3	78	37.5	21.3	29.7	12	12.4	265	5.2	0.14	8.8	Negative	Homozygous HbAA/HbAA
1	8.84	46.3	9.2	44.5	4.56	71.5	32.6	23	32.2	10.9	10.5	312	4.8	0.15	9	Negative	Heterozygous HbAA/HbSS
1	8.11	36.4	12.7	50.9	3.89	63.7	24.7	19.5	30.7	10.5	7.6	229	5.6	0.13	7.3	Negative	Heterozygous HbAA/HbSS
1	8.42	33.3	8.8	57.9	5.73	79	45.2	19.1	24.3	10.9	11	468	5.8	0.27	9.8	Negative	Homozygous HbAA/HbAA
1	5.56	52	7.6	40.4	4.17	89.3	37.2	26.3	29.5	10	11	307	5.7	0.17	10.7	Negative	Homozygous HbAA/HbAA
1	7.6	18.3	17.5	64.2	5.43	73	39.6	20.9	28.7	10.7	11.4	362	5.1	0.18	8.8	Positive	Heterozygous HbAA/HbSS
1	7.97	18.4	22.5	59.1	4.62	71.9	33.2	22.7	31.6	11.8	10.5	224	5.9	0.13	10.4	Positive	Heterozygous HbAA/HbSS
1	6.9	38	11.2	50.8	3.93	81.9	32.1	25.9	31.7	9.6	10.2	183	5.2	0.1	8.5	Positive	Homozygous HbAA/HbAA
1	10.9	37	12.8	50.2	1.19	84.7	10	23.5	28	12.6	2.8	136	5.6	0.08	11.5	Positive	Homozygous HbAA/HbAA
1	5.73	34.6	11.3	54.1	4.73	65.3	30.8	20	30.8	10	9.5	435	5.2	0.23	8.6	Positive	Homozygous HbAA/HbAA
1	10.81	13.2	8	78.8	5.3	67.4	35.7	21.8	32.4	12.5	11.6	194	5.7	0.11	9.9	Positive	Homozygous HbAA/HbAA
1	2.61	26.7	10.4	62.9	4.87	72.3	35.2	20.5	28.4	11.6	10	205	5.1	0.1	9	Negative	Homozygous HbAA/HbAA
2	8.59	34.2	11.6	54.2	5.02	78.2	39.2	21.9	28	10.5	11	340	5.4	0.18	88	Negative	Homozygous HbAA/HbAA
2	5.46	46.4	7.5	46.1	4.18	82.4	34.4	24.4	29.6	9.8	10.5	196	5.1	0.1	9.6	Negative	Heterozygous HbAA/HbSS
2	5.92	29.3	7.1	63.6	5.91	82.1	48.5	21.8	26.5	9.4	12.9	412	5.2	0.21	9.6	Negative	Homozygous HbAA/HbAA
2	11.56	19.8	8.4	71.8	5.94	65	38.6	15.9	24.6	12.5	9.5	288	6.5	0.19	11.5	Negative	Heterozygous HbAA/HbSS
2	5.88	31.8	12.1	56.1	4.96	77.4	38.3	23.7	30.8	11.1	11.8	68	5.4	0.04	9.7	Positive	Homozygous HbAA/HbAA
2	15.84	40.6	7.7	51.7	3.67	76.1	27.9	21.2	27.9	25	7.8	188	5.6	0.11	7.8	Negative	Homozygous HbSS/HbSS
2	13.99	51.9	7.9	40.2	3.9	74.6	29	21	28.2	22.9	8.2	194	4.9	0.1	8.8	Negative	Homozygous HbSS/HbSS
2	6.03	52	6.5	41.5	5.39	73.4	39.5	22.8	31.1	10.4	12.3	377	5.3	0.2	8.9	Negative	Homozygous HbAA/HbAA
2	6.56	34.3	15.3	50.4	5.03	82.8	41.6	24.4	29.5	10.3	12.3	277	6.1	0.17	10.1	Negative	Heterozygous HbAA/HbSS
2	6.9	19.8	13.4	66.8	4.43	73.8	32.6	22.1	30	10.7	9.8	254	5	0.13	9.6	Positive	Homozygous HbAA/HbAA
2	6.2	55.9	5.2	38.9	3.98	78.5	31.2	24.3	31	9.2	9.2	196	5.5	0.11	9.2	Positive	Homozygous HbAA/HbAA
2	15.49	31.1	7.3	61.6	1.58	91.1	14.3	25.9	28.6	22	4.1	114	6.2	0.07	14	Positive	Homozygous HbSS/HbSS
2	14.73	16.7	10.3	73	4.66	79.6	37	23.3	29.4	10.1	10.9	203	5.3	0.11	9.7	Negative	Homozygous HbAA/HbAA
2	10	19	12.5	68	5.2	77.5	40.7	23	30.4	11.2	12.4	131	5.1	0.07	9.1	Positive	Homozygous HbAA/HbAA
2	7.5	29.7	12.6	57.7	6.38	68.4	43.6	17.8	26.1	10.5	11.4	138	5.3	0.15	9.7	Positive	Homozygous HbAA/HbAA
2	9.23	18.7	13	68.3	4.95	81.2	40.1	24.8	30.6	10.9	12.3	415	5.1	0.21	8.5	Negative	Homozygous HbAA/HbAA
2	5.1	47.3	8.5	44.2	4.54	86.6	39.3	24	27.7	10.4	10.9	169	5.8	0.22	9.6	Negative	Homozygous HbAA/HbAA
2	6.81	17.6	8.9	73.5	4.28	82.7	35.3	24	29.1	12.2	10.3	198	5.4	0.11	9.9	Positive	Homozygous HbAA/HbAA
2	6.54	12.2	5.4	82.4	4.58	78	35.7	23.7	30.5	11.7	10.9	126	5.3	0.07	9.5	Positive	Homozygous HbAA/HbAA
2	3.65	55.8	8.4	35.8	5.63	76.3	42.9	21.3	27.9	10.5	12	258	5.7	0.15	10.9	Negative	Heterozygous HbAA/HbSS
2	16.48	34.2	14.7	50.1	3.26	91.7	29.8	25.1	27.5	22.2	8.2	482	5.6	0.27	9.8	Negative	Homozygous HbSS/HbSS
2	5.48	39.9	8.4	51.7	4.57	78.5	34.6	22.5	29.7	12.6	10.3	189	4.9	0.09	9.4	Positive	Homozygous HbAA/HbAA
2	5.64	35.9	8.5	55.6	5.33	72.4	38.5	21	29	10.4	11.2	193	5.8	0.11	12	Positive	Homozygous HbAA/HbAA
2	5.83	10.3	6.7	83	5.31	79.1	42	21.8	27.6	11.3	11.6	243	5.5	0.13	10.8	Positive	Homozygous HbAA/HbAA
3	7.19	47.9	7.2	44.9	5.1	83.7	42.6	21.7	26	10.4	11.1	243	5.7	0.14	11.1	Negative	Homozygous HbAA/HbAA
3	14.26	29.5	13.2	57.3	2.94	83.7	24.6	25.1	30	22.4	7.4	310	5.4	0.17	9.4	Negative	Homozygous HbAA/HbAA
3	4.77	43.6	9.4	47	5.1	87.7	44.7	24.7	28.1	10.1	12.6	243	6	0.15	11.6	Negative	Heterozygous HbAA/HbSS
3	7.57	41	11.5	47.5	4.47	76.8	34.3	24.6	32	11.2	11	237	5.2	0.12	8.4	Negative	Homozygous HbAA/HbAA
3	4.81	36.1	10.3	53.6	4.74	78.8	37.3	24.6	31.3	10.5	11.7	196	5.8	0.11	10.5	Negative	Homozygous HbAA/HbAA
3	5.51	45.9	11.3	42.8	4.55	83.8	38.1	24.1	28.8	11.7	11	209	5.8	0.12	10.4	Negative	Homozygous HbAA/HbAA
3	4.42	19.3	8.4	72.3	5.75	82.8	47.6	22.9	27.7	9.5	13.2	111	5.6	0.06	12.6	Positive	Homozygous HbAA/HbAA
3	7.6	20.9	9.2	69.9	4.6	80.5	37	22.8	28.3	15.8	10.5	357	5.7	0.2	10.6	Negative	Homozygous HbAA/HbAA
